# Supplementary material
Source: PubMed Central journal article supplement (PMC7643274)
Supplement: ao0c04243_si_001.pdf [file ao0c04243_si_001.pdf]

**Supporting information for:**  
**Refined Force Field for Liquid Sulfolane with**  
**Particular Emphasis to Its Transport**  
**Characteristics**

Srimayee Mukherji, Nikhil V.S. Avula and Sundaram Balasubramanian\*

*Chemistry and Physics of Materials Unit*

*Jawaharlal Nehru Centre for Advanced Scientific Research, Bangalore 560 064, India*

E-mail: bala@jncasr.ac.in

## Contents

|   |                                                                       |    |
|---|-----------------------------------------------------------------------|----|
| 1 | Determination of Gas-Phase DDEC6 Charges                              | S3 |
| 2 | Charge Distribution Obtained in Liquid-Phase DDEC6 Charge Calculation | S4 |
| 3 | Bonded Parameters                                                     | S4 |
| 4 | Additional MD Details                                                 | S6 |
| 5 | Example of Block Average Calculation. Illustrated Via Density         | S7 |
| 6 | Additional Radial Distribution Function Plots                         | S8 |
| 7 | Details for Single-Molecule Volume Calculation                        | S8 |

|           |                                                                              |            |
|-----------|------------------------------------------------------------------------------|------------|
| <b>8</b>  | <b>Uncertainty Calculation for Heat of Vaporization</b>                      | <b>S9</b>  |
| <b>9</b>  | <b>Calculation of Surface Tension - Details</b>                              | <b>S9</b>  |
| <b>10</b> | <b>Shear Viscosity</b>                                                       | <b>S10</b> |
| 10.1      | Calculation of Shear Viscosity . . . . .                                     | S10        |
| 10.2      | Calculation of Mean Shear Viscosity and Uncertainty on the mean - Details .  | S12        |
| <b>11</b> | <b>Diffusion Constant</b>                                                    | <b>S12</b> |
| 11.1      | Defining the Diffusive Regime . . . . .                                      | S12        |
| 11.2      | Calculation of Mean Diffusion Constant and Uncertainty on the Mean - Details | S13        |

## Determination of Gas-Phase DDEC6 Charges

Gas-phase DDEC6 charges<sup>S1</sup> were obtained from single molecule quantum chemical gas-phase optimization, followed by wave-function determination, both of which were carried out in Gaussian 16.<sup>S2</sup> This procedure is in contrast with the procedure used to obtain charges in ref S3. Subsequently in our procedure, charge-partitioning was carried out using Chargemol software<sup>S4</sup> using the wavefunction file as input. The charges obtained were averaged over all atoms of the same atom-type to obtain average gas-phase DDEC6 charges given in Table S1.

Table S1: Single-molecule gas-phase atomic-site DDEC6 charges,  $q(e)$ , used in the MD run from which independent snapshots were chosen for liquid-phase DDEC6 charge calculation. These gas-phase DDEC6 charges were also used for total potential energy calculation for potential energy surfaces (PES) of the refined force field presented in Figure 2 of the main manuscript.

| Atom type | $q / e$  |
|-----------|----------|
| SFO       | 1.21259  |
| OFO       | -0.62659 |
| CS1       | -0.32635 |
| CS2       | -0.12475 |
| HC1       | 0.14217  |
| HC2       | 0.09352  |

# Charge Distribution Obtained in Liquid-Phase DDEC6

## Charge Calculation

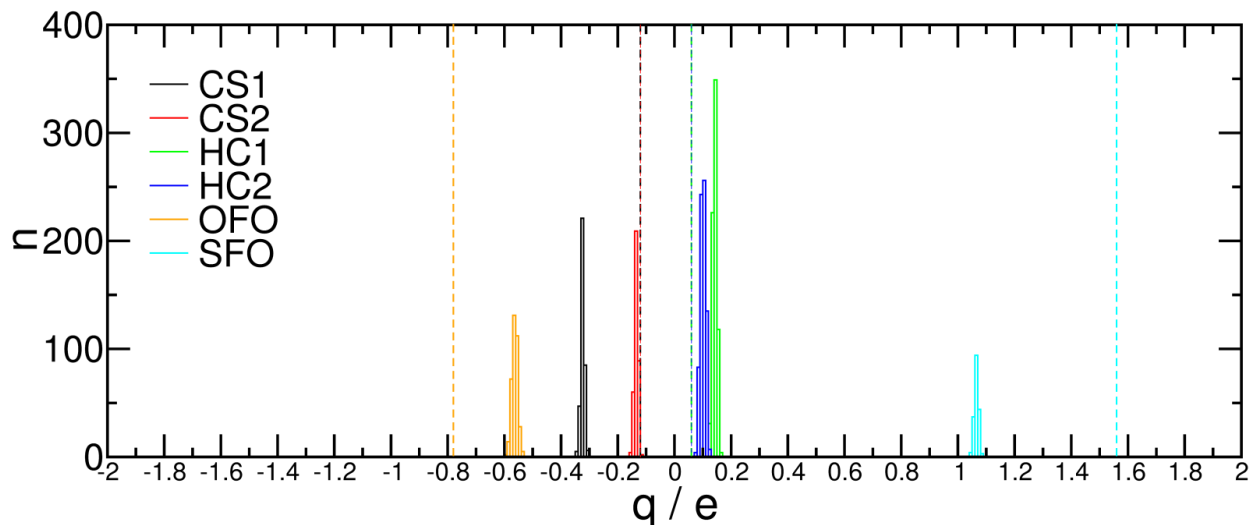

Figure S1: Distribution of charges, ( $q$ ) according to atom types, obtained from seven liquid phase snapshots, energy minimized within quantum density functional theory. Subsequently, the electron density obtained thus, was used to derive atomic site charges.  $n$  is the count of a bin of width 0.01 e. Dashed lines represent the charges of the force field<sup>S3</sup> from which the current force field was developed. Snapshots were chosen from the MD simulation as described in the main manuscript at temperature  $T = 303$  K and pressure  $p = 1$  bar. The narrow distributions of the site charges justify the use of a non-polarizable force field. Differences in the mean values of liquid phase site charges from the corresponding gas phase values indicates the need to derive charges from condensed phase simulations.

## Bonded Parameters

The equilibrium values of bond lengths and angles of sulfolane were obtained from the geometry optimization of a single-molecule, at MP2/aug-cc-pvdz level of theory (see tables S2 and S3). The bond and angle force-constants were used as given in ref S3.

Table S2: Bond parameters used in the refined force field. Equilibrium bond-length  $r_0$  (Å) and force-constant  $k_b$  (kJ·mol<sup>-1</sup>·Å<sup>-2</sup>) of equation 1 in the main manuscript.

| Bond type | $r_0$ | $k_b$     |
|-----------|-------|-----------|
| SFO-OFO   | 1.497 | 10660.832 |
| SFO-CS1   | 1.893 | 3941.328  |
| CS1-CS2   | 1.534 | 2242.624  |
| CS2-CS2   | 1.545 | 2242.624  |
| CS1-HC1   | 1.099 | 2769.808  |
| CS2-HC2   | 1.016 | 2769.808  |

Table S3: Angle parameters used in the refined force field. Equilibrium angle  $\theta_0$  (degree) and force-constant  $k_\theta$  (kJ·mol<sup>-1</sup>·rad<sup>-2</sup>) of equation 1 in the main manuscript.

| Angle type  | $\theta_0$ | $k_\theta$ |
|-------------|------------|------------|
| OFO-SFO-OFO | 120.77     | 1941.38    |
| OFO-SFO-CS1 | 109.34     | 1740.54    |
| CS1-SFO-CS1 | 95.83      | 1631.76    |
| CS2-CS1-SFO | 104.46     | 1389.09    |
| CS1-CS2-HC2 | 110.80     | 313.21     |
| CS2-CS1-HC1 | 113.98     | 313.21     |
| HC1-CS1-HC1 | 111.06     | 276.14     |
| HC2-CS2-HC2 | 108.12     | 276.14     |
| CS2-CS2-HC2 | 110.80     | 313.21     |
| CS2-CS2-CS1 | 106.12     | 836.80     |
| SFO-CS1-HC1 | 106.23     | 313.21     |

## Additional MD Details

Table S4: Averaged box-sizes from NPT production from different force fields. Box-lengths for simulations using the refined force field at different temperatures and at pressure  $p = 1$  bar are also reported. These box-sizes were used for NVT runs on which majority of the analyses were conducted.

| Temperature | Force field           | NPT averaged box-length ( $\text{\AA}$ ) |
|-------------|-----------------------|------------------------------------------|
| 303         | Force field of ref S3 | 49.8647                                  |
| 303         | OPLS                  | 50.3709                                  |
| 303         | This work             | 49.8082                                  |
| 313         | This work             | 49.9531                                  |
| 323         | This work             | 50.1071                                  |
| 348         | This work             | 50.5048                                  |
| 373         | This work             | 50.9340                                  |
| 398         | This work             | 51.3757                                  |

# Example of Block Average Calculation. Illustrated Via Density

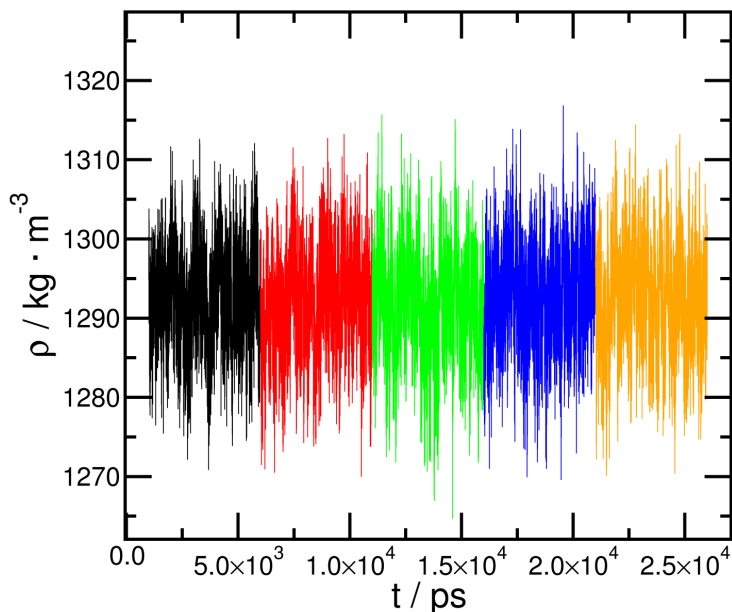

Figure S2: Density as a function of time (from 1 ns to 26 ns) of the NPT production run of the refined force field reported in this work. The run was conducted at temperature  $T = 303$  K, and pressure  $p = 1$  bar. Each block is represented by a different color. The blocks are assumed to be independent as in ref S5.

$$\text{Average density, } \rho = \frac{\sum_{i=1}^{N_{blocks}} \rho_{i,avg}}{N_{blocks}};$$

$$\text{Standard deviation on the average density is } U = \left( \frac{\sum_{i=1}^{N_{blocks}} (\rho_{i,avg} - \rho)^2}{N_{blocks}(N_{blocks}-1)} \right)^{1/2}$$

Here,  $\rho_{i,avg}$  is the average density of block  $i$ ,  $N_{blocks}$  is the number of blocks = 5 (in this case). Number of timesteps comprising each independent block,  $S_{prod} = 5000$  density points (one per picosecond).  $\rho$  is the mean density averaged over individual blocks.  $\rho$  is reported along with calculated uncertainty  $U$  in an interval form in the main manuscript with a confidence level of 0.95 ( $k=2$ ).

## Additional Radial Distribution Function Plots

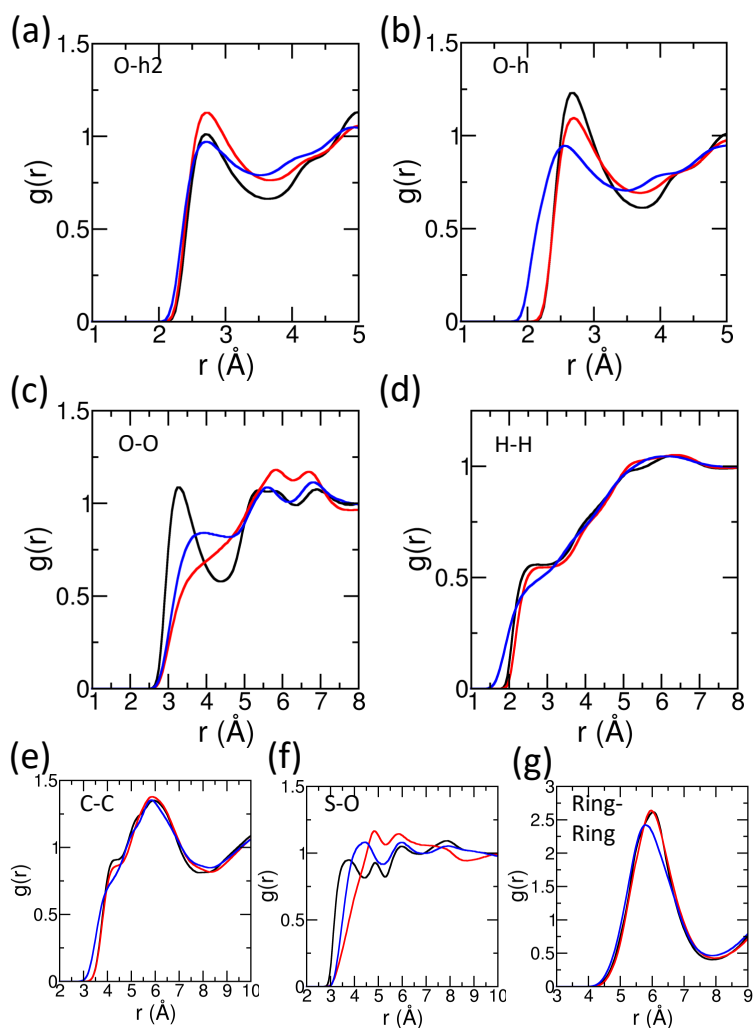

Figure S3: Intermolecular radial distribution function between the following groups of atoms - (a) OFO-HC2, (b) OFO-any H, (c) OFO-OFO, (d) any H-any H, (e) any C-any C, (f) SFO-OFO, and (g) Center of ring - Center of ring. Black - ref S3, red - OPLS, and blue - this work.

## Details for Single-Molecule Volume Calculation

The volume of a single mp2/aug-cc-pvdz optimized molecule was calculated in a method similar to that in Ref. S6, i.e. a Monte-Carlo method for calculating volume was employed.



The volume calculation was carried out in the Gaussian 16<sup>S2</sup> software, using the ‘volume’ keyword. The electron-density was obtained through a calculation performed using B3LYP/6-311++g(d,p) level of theory and basis-set. The convergence criterion requested was  $10^{-6}$  for energy and  $10^{-7}$  for RMS density. A density envelope used was 0.001 e/bohr<sup>3</sup>. Since, molecular volume of sulfolane was calculated only to obtain a rough estimate of its size, we do not report this number as a true estimate of its size.

## Uncertainty Calculation for Heat of Vaporization

$$\text{Average heat of vaporization } \Delta H = \frac{\sum_{i=1}^{N_{sample}} \Delta H_{i,avg}}{N_{sample}};$$

$$\text{Standard deviation on the average heat of vaporization is } U = \left( \frac{\sum_{i=1}^{N_{sample}} (\Delta H_{i,avg} - \Delta H)^2}{N_{sample}(N_{sample}-1)} \right)^{1/2}$$

Here,  $\Delta H_{i,avg}$  is the average heat of vaporization of independent run  $i$ , calculated from the average total energy of the sulfolane molecule  $E_{gas,i}$  in the  $i^{th}$  run.  $N_{sample}$  is the number of independent runs = 3 (in this case).  $S_{prod} = 30000$  is the number of total energy points per independent run (one every picosecond).  $E_{liq}$ , the average total energy of a sulfolane molecule in the liquid state, was obtained from a single NVT run in the respective force field and is a constant across the independent calculations of  $\Delta H$  for a given force field.  $\Delta H$  is the mean heat-of-vaporization averaged over three independent runs.  $\Delta H$  with calculated uncertainty  $U$  is reported in an interval form in the main manuscript with a confidence level of 0.95 (k=2).

## Calculation of Surface Tension - Details

To calculate surface tension, a pre-equilibrated cubic simulation box containing 800 molecules was stretched along the z-axis (150 Å) by approximately three times its size along the x or y-axis ( $\approx 50$  Å). Surface tension was estimated from three independent NVT runs ( $N_{sample} = 3$ ), of run length 10 ns each. i.e.,  $S_{prod} = 10000000$  timesteps. Three independent runs of

duration of 100 ns ( $S_{prod} = 100000000$ ) was needed for the simulations using the force field of ref S3 to account for the time required for the various pressure components to equilibrate in this high viscosity force field. Components of the pressure tensor were saved at every timestep (1 fs). Surface tension,  $\gamma$ , was calculated using the relation  $\gamma = l_z/4(2P_{zz} - P_{xx} - P_{yy})$  as in ref S7, where  $P_{xx}$ ,  $P_{yy}$  and  $P_{zz}$  are the diagonal components of the stress tensor, and  $l_z$  is the length of the simulation box along the  $z$ -axis.

## Shear Viscosity

### Calculation of Shear Viscosity

The shear viscosity ( $\eta$ ) was calculated from the Green-Kubo relation as given in ref S8 and defined in equation 1. Here,  $P_{\alpha\beta}$  is the  $\alpha\beta$  off-diagonal ( $\alpha \neq \beta$ ) component of the pressure tensor.  $k_B$  is the Boltzmann constant,  $T$  is temperature,  $V$  is the volume of the system, and  $t$  time. An example for the pressure tensor correlation function is shown in Figure S4.

$$\eta(t) = \frac{V}{k_B T} \int_0^t \langle P_{\alpha\beta}(t') \cdot P_{\alpha\beta}(0) \rangle dt' \quad (1)$$

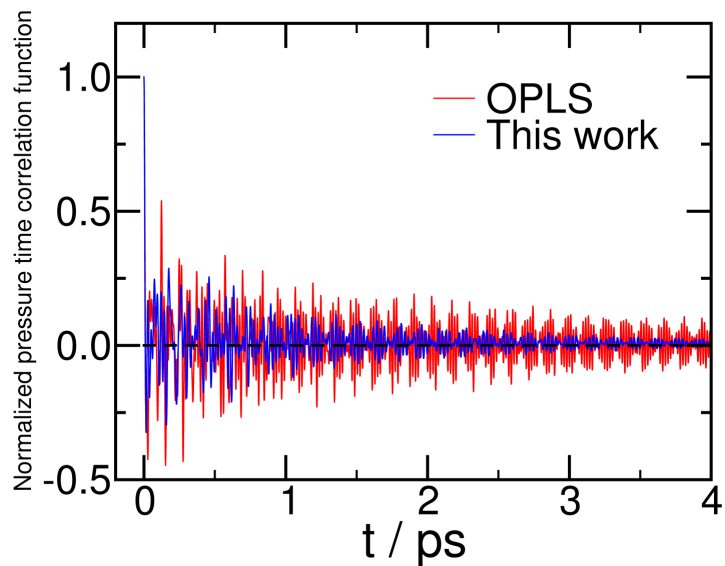

Figure S4: The pressure tensor correlation function for the OPLS force field and from this work at state point temperature  $T = 303$  K, and pressure  $p = 1$  bar.

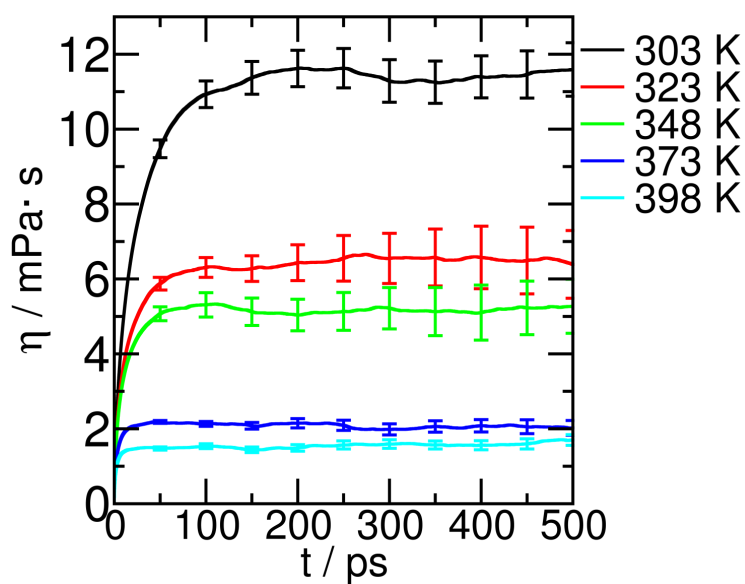

Figure S5: Graphical representation of equation 1 as a function of temperature. Data from the force field refined in this study

# Calculation of Mean Shear Viscosity and Uncertainty on the mean - Details

Five independent trajectories for viscosity calculation corresponding to each force field were performed with pressure components dumped every timestep (1 fs). Each run was in turn divided into four blocks for viscosity calculation from SI equation S1, while considering each block to be independent. A total of twenty independent runs of length 5 ns each were obtained. Error bars on the running intergral obtained from averaging over twenty independent running integrals was calculated at an interval of 50 ps. To report a single value for viscosity, we consider the mean running integral of viscosity in the steady region up to 500 ps. We divide the steady portion of the running integral (200 ps to 500 ps) into three blocks ( $N_{sample} = 3$ ) of 100 ps duration each ( $S_{prod} = 100000$  steps). Through block averaging method, we arrive at the mean shear viscosity, and the uncertainty on the average, just as we did for density.

## Diffusion Constant

### Defining the Diffusive Regime

The mean-squared displacement ( $\langle |\Delta \mathbf{r}|^2 \rangle$ ) grows with time-interval ( $t$ ) according to a general expression:  $\langle |\Delta \mathbf{r}|^2 \rangle = 6Dt^\beta$ . Here,  $\beta$  is an exponent determining the regime of dynamics of the system, and  $D$  is the self-diffusion constant. When exponent  $\beta$  reaches  $\approx 1$  in time interval  $t$ , the system is said to have entered the diffusive regime from a sub-diffusive regime.

$$\beta(t) = \frac{d \ln(\langle |\Delta \mathbf{r}|^2 \rangle)}{d \ln(t)} \quad (2)$$

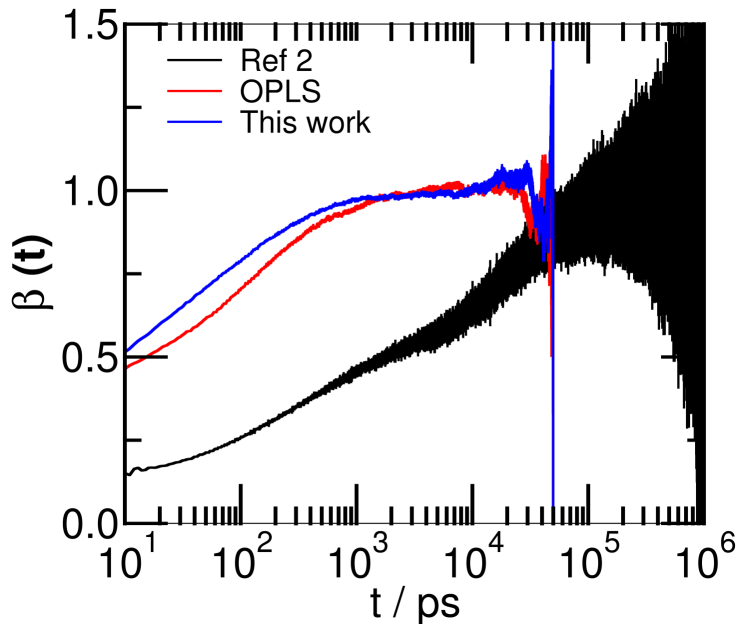

Figure S6:  $\beta$  as a function of time is used to determine the diffusive regime in each force field studied. Data at temperature  $T = 303$  K, and pressure  $p = 1$  bar.

## Calculation of Mean Diffusion Constant and Uncertainty on the Mean - Details

The  $\beta(t) \approx 1$  of MSD was divided into three blocks ( $N_{blocks} = 3$ ) of duration 8 ns each ( $S_{prod} = 8000$  one point per picosecond). The blocks were considered to be independent. The slope ( $6Dt$ ) of MSD in these blocks were averaged to arrive at the self-diffusion constants  $D$  quoted in Tables 10 and 11 of the main manuscript. In the liquid modeled with the force field of ref S3, sulfolane was found to be extremely sluggish and sub-diffusive, with a nominally estimated diffusion constant which was at least two orders of magnitude less than the experimental value at 303 K. For this force field alone, a  $1\mu s$  run was required to obtain a sufficient run-length in the diffusive regime for calculating the self-diffusion constant. In this case, MSD (200 ns to 500 ns) was divided into three blocks of length 100 ns each ( $S_{prod} = 100000$ ). The calculation of uncertainty  $U$  on the block averaged diffusion constant was calculated in a manner very similar to the calculation of uncertainty for density.

## References

- (S1) Manz, T. A.; Limas, N. G. Introducing DDEC6 atomic population analysis: part 1. Charge partitioning theory and methodology. *RSC Adv.* **2016**, *6*, 47771–47801.
- (S2) Frisch, M.; Trucks, G.; Schlegel, H.; Scuseria, G.; Robb, M.; Cheeseman, J.; Scalmani, G.; Barone, V.; Petersson, G.; Nakatsuji, H. et al. Gaussian 16 revision a. 03. 2016; gaussian inc. *Wallingford CT* **2016**, *2*.
- (S3) Dokko, K.; Watanabe, D.; Ugata, Y.; Thomas, M. L.; Tsuzuki, S.; Shinoda, W.; Hashimoto, K.; Ueno, K.; Umebayashi, Y.; Watanabe, M. Direct Evidence for Li Ion Hopping Conduction in Highly Concentrated Sulfolane-Based Liquid Electrolytes. *J. Phys. Chem. B* **2018**, *122*, 10736–10745.
- (S4) Limas, N. G.; Manz, T. A. Introducing DDEC6 atomic population analysis: part 4. Efficient parallel computation of net atomic charges, atomic spin moments, bond orders, and more. *RSC Adv.* **2018**, *8*, 2678–2707.
- (S5) Zhang, Y.; Zhang, Y.; McCready, M. J.; Maginn, E. J. Evaluation and refinement of the general AMBER Force Field for nineteen pure organic electrolyte solvents. *J. Chem. Eng. Data* **2018**, *63*, 3488–3502.
- (S6) Brooks, N. J.; Castiglione, F.; Doherty, C. M.; Dolan, A.; Hill, A. J.; Hunt, P. A.; Matthews, R. P.; Mauri, M.; Mele, A.; Simonutti, R. et al. Linking the structures, free volumes, and properties of ionic liquid mixtures. *Chem. Sci.* **2017**, *8*, 6359–6374.
- (S7) Orozco, G. A.; Moulton, O. A.; Jiang, H.; Economou, I. G.; Panagiotopoulos, A. Z. Molecular simulation of thermodynamic and transport properties for the H<sub>2</sub>O+ NaCl system. *J. Chem. Phys.* **2014**, *141*, 234507.
- (S8) Zhang, Y.; Otani, A.; Maginn, E. J. Reliable viscosity calculation from equilibrium

molecular dynamics simulations: A time decomposition method. *J. Chem. Theory Comput.* **2015**, *11*, 3537–3546.
